# Supplementary material for: A multi-institutional prospective observational study to evaluate fascia iliaca compartment block (FICB) for preventing delirium in adults with hip fracture
Source: HighWire-hosted journal article supplement (doi:10.1136/tsaco-2022-000904), 2022-04-01
Supplement: tsaco-2022-000904supp001_data_supplement.pdf [file tsaco-2022-000904supp001_data_supplement.pdf]

**Supplementary Table 1. Multivariate Linear regression: oral morphine equivalents (OMEs), log transformed**

| Covariate                       | LSM (log)        |                  | LSM (log)         |                  |
|---------------------------------|------------------|------------------|-------------------|------------------|
|                                 | preoperative OME | p value          | postoperative OME | p value          |
| FICB vs. no FICB                | 3.67 vs. 3.62    | 0.75             | 4.03 vs. 4.14     | 0.51             |
| General vs. regional anesthesia | 3.55 vs. 3.74    | 0.32             | 3.97 vs. 4.20     | 0.27             |
| ASA score $\geq$ III vs. I/II   | 3.58 vs. 3.71    | 0.40             | 3.98 vs. 4.19     | 0.18             |
| Anticoagulant vs. not           | 3.76 vs. 3.54    | 0.24             | 4.21 vs. 3.96     | 0.18             |
| Smoker vs. non-smoker           | 4.01 vs. 3.28    | <b>0.001</b>     | 4.57 vs. 3.60     | <b>&lt;0.001</b> |
| Head/neck fracture vs. other    | 3.60 vs. 3.70    | 0.47             | 3.87 vs. 4.29     | <b>0.004</b>     |
| Surgery > 24h vs timely surgery | 4.01 vs. 3.28    | <b>&lt;0.001</b> | 4.25 vs. 3.92     | 0.06             |

Adjusted for variables with  $p < 0.10$  in univariate analysis. Bolding denotes statistical significance. FICB, fascia iliaca compartment block; ASA, American Society of Anesthesiologist classification

**Supplementary Table 2. Multivariate Linear regression: LSM pain numeric rating scale (NRS, 0-10) scores**

| Covariate                       | LSM preoperative |              | LSM postoperative |             |
|---------------------------------|------------------|--------------|-------------------|-------------|
|                                 | pain score       | p value      | pain score        | p value     |
| FICB vs. no FICB                | 4.24 vs. 5.06    | <b>0.002</b> | 2.94 vs. 3.47     | <b>0.04</b> |
| General vs. regional anesthesia | 4.68 vs. 4.62    | 0.86         | 3.52 vs. 2.88     | 0.05        |
| ASA score $\geq$ III vs. I/II   | 4.79 vs. 4.52    | 0.28         | 3.27 vs. 3.13     | 0.56        |
| Anticoagulant vs. not           | 4.75 vs. 4.55    | 0.51         | 3.45 vs. 2.95     | 0.09        |
| Smoker vs. non-smoker           | 5.15 vs. 4.16    | <b>0.01</b>  | 3.28 vs. 3.12     | 0.64        |
| Head/neck fracture vs. other    | 4.54 vs. 4.77    | 0.32         | 2.94 vs. 3.46     | <b>0.02</b> |
| Surgery > 24h vs timely surgery | 4.57 vs. 4.73    | 0.57         | 3.23 vs. 3.17     | 0.82        |

Adjusted for variables with  $p < 0.10$  in univariate analysis. Bolding denotes statistical significance. FICB, fascia iliaca compartment block; ASA, American Society of Anesthesiologist classification
